# Supplementary material for: Effects of aging and hydrothermal treatment on the crystallization of ZSM-5 zeolite synthesis from bentonite
Source: PubMed Central journal article supplement — RSC Adv. 2023 Jul 10;13(30):20565–74. doi: 10.1039/d3ra02552g (PMC10331798; doi:10.1039/d3ra02552g), 2023-07-10
Supplement: RA-013-D3RA02552G-s001.pdf [file RA-013-D3RA02552G-s001.pdf]

## Supporting Information for

### Effects of aging and hydrothermal treatment on the crystallization of ZSM-5 zeolite synthesis from bentonite

Duy-Khoi Nguyen<sup>a,b,c</sup>, Van-Phuc Dinh<sup>c,\*</sup>, N. T. Dang<sup>d,e</sup>, D. Thanh Khan<sup>f</sup>, Nguyen Trong Hung<sup>g</sup>, Nhu Hoa Thi Tran<sup>h,i</sup>

<sup>a</sup> *Institute of Fundamental and Applied Sciences, Duy Tan University, Ho Chi Minh City 700000, Vietnam.*

<sup>b</sup> *Nuclear Training Center, Vietnam Atomic Energy Institute, 140 Nguyen Tuan, Thanh Xuan, Ha Noi, Vietnam.*

<sup>c</sup> *Institute of Applied Technology and Sustainable Development, Nguyen Tat Thanh University, Ho Chi Minh City 700000, Vietnam.*

<sup>d</sup> *Institute of Research and Development, Duy Tan University, Da Nang City 550000, Vietnam.*

<sup>e</sup> *Faculty of Natural Sciences, Duy Tan University, Da Nang City 550000, Vietnam.*

<sup>f</sup> *University of Science and Education, The University of Da Nang, Da Nang City 550000, Vietnam.*

<sup>g</sup> *Institute for Technology of Radioactive and Rare Elements, 48-Lang Ha, Dong Da, Hanoi 100000, Vietnam.*

<sup>h</sup> *Faculty of Materials Science and Technology, University of Science, Ho Chi Minh City 700000, Vietnam.*

<sup>i</sup> *Vietnam National University, Ho Chi Minh City 700000, Vietnam.*

\* Corresponding author: [dvphuc@ntt.edu.vn](mailto:dvphuc@ntt.edu.vn).

**Table S1. XRF results of the raw and refined Lam Dong bentonite clay.**

| Raw bentonite                  |                           | Refined bentonite              |                           |
|--------------------------------|---------------------------|--------------------------------|---------------------------|
| Constituent                    | Constituent content (wt%) | Constituent                    | Constituent content (wt%) |
| SiO <sub>2</sub>               | 51.00                     | SiO <sub>2</sub>               | 63.38                     |
| Al <sub>2</sub> O <sub>3</sub> | 21.16                     | Al <sub>2</sub> O <sub>3</sub> | 22.53                     |
| K <sub>2</sub> O               | 1.93                      | K <sub>2</sub> O               | 4.35                      |
| Fe <sub>2</sub> O <sub>3</sub> | 7.93                      | Fe <sub>2</sub> O <sub>3</sub> | 4.07                      |
| CaO                            | 0.80                      | CaO                            | 2.32                      |
| P <sub>2</sub> O <sub>5</sub>  | 0.11                      | P <sub>2</sub> O <sub>5</sub>  | 2.06                      |
| MgO                            | 0.79                      | MgO                            | 0.65                      |
| ZrO <sub>2</sub>               | 0.05                      | ZrO <sub>2</sub>               | 0.27                      |
| NbO <sub>2</sub>               | 0.005                     | NbO <sub>2</sub>               | 0.21                      |
| Na <sub>2</sub> O              | 0.10                      | Na <sub>2</sub> O              | 0.17                      |
| <b>LOI</b>                     | <b>12.44</b>              |                                |                           |
| Other oxides                   | 3.79                      |                                |                           |

“LOI = lost on ignition”

**Table S2. Effect of aging and hydrothermal conditions on the crystallization of ZSM-5 samples**

| Sample                             | Aging condition |                               |
|------------------------------------|-----------------|-------------------------------|
|                                    | Temp. (°C)      | Time (h)                      |
| RT-12h                             | RT              | 12                            |
| RT-36h                             | RT              | 36                            |
| <b>RT-60h</b>                      | <b>RT</b>       | <b>60</b>                     |
| <b>60°C-12h</b>                    | <b>60</b>       | <b>12</b>                     |
| 60°C-36h                           | 60              | 36                            |
| 60°C-60h                           | 60              | 60                            |
| <b>80°C-12h</b>                    | <b>80</b>       | <b>12</b>                     |
| 80°C-36h                           | 80              | 36                            |
| 80°C-60h                           | 80              | 60                            |
| Sample                             | Aging           | Hydrothermal time (h), 170 °C |
| A <sub>RT-60</sub> H <sub>3</sub>  | RT, 60 h        | 3                             |
| A <sub>RT-60</sub> H <sub>6</sub>  |                 | 6                             |
| A <sub>RT-60</sub> H <sub>9</sub>  |                 | 9                             |
| A <sub>RT-60</sub> H <sub>12</sub> |                 | 12                            |
| A <sub>RT-60</sub> H <sub>15</sub> |                 | 15                            |
| A <sub>60-12</sub> H <sub>3</sub>  | 60 °C, 12 h     | 3                             |
| A <sub>60-12</sub> H <sub>6</sub>  |                 | 6                             |
| A <sub>60-12</sub> H <sub>9</sub>  |                 | 9                             |
| A <sub>60-12</sub> H <sub>12</sub> |                 | 12                            |
| A <sub>60-12</sub> H <sub>15</sub> |                 | 15                            |
| A <sub>80-12</sub> H <sub>3</sub>  | 80 °C, 12 h     | 3                             |

|                   |  |    |
|-------------------|--|----|
| $A_{80-12}H_6$    |  | 6  |
| $A_{80-12}H_9$    |  | 9  |
| $A_{80-12}H_{12}$ |  | 12 |
| $A_{80-12}H_{15}$ |  | 15 |

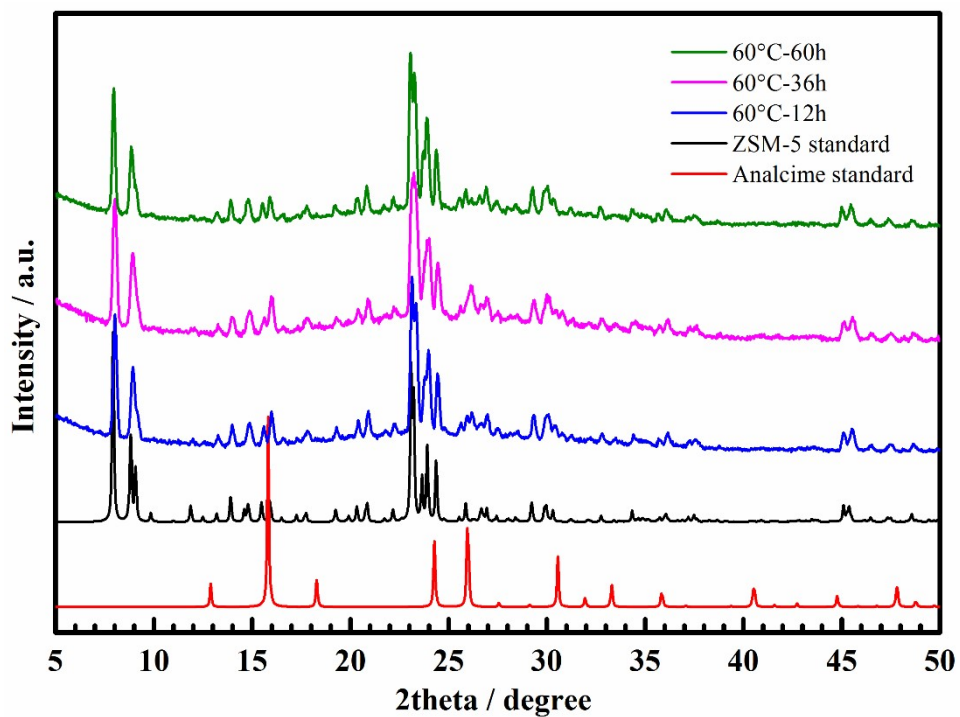

**Figure S1. XRD pattern of ZSM-5 sample aged at 60 °C for 12, 36, 60 hours.**

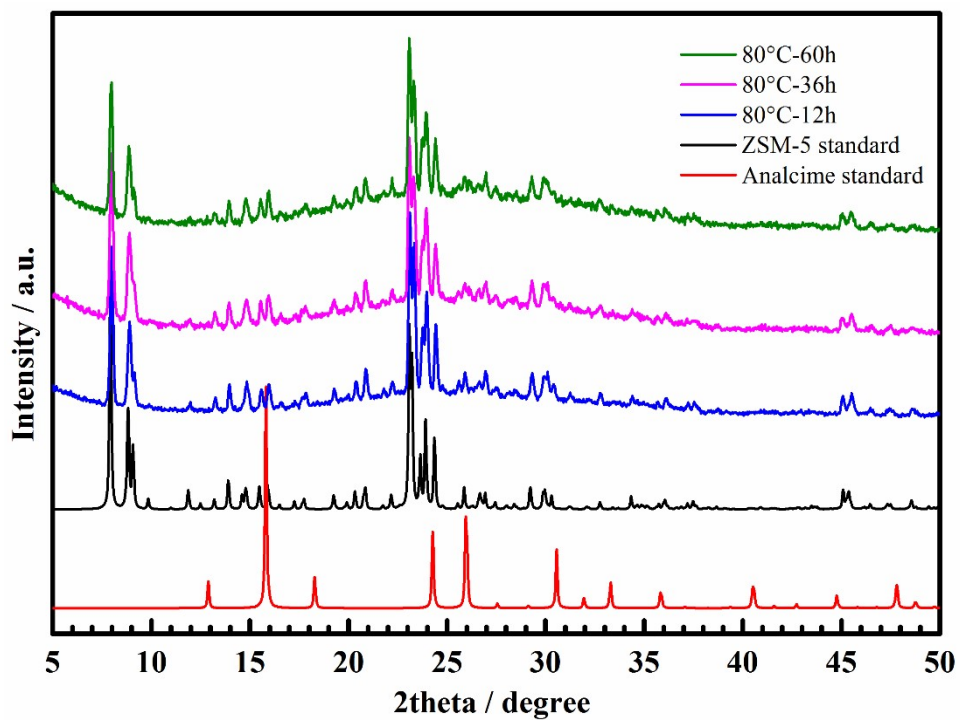

Figure S2. XRD pattern of ZSM-5 sample aged at 80 °C for 12, 36, 60 hours.

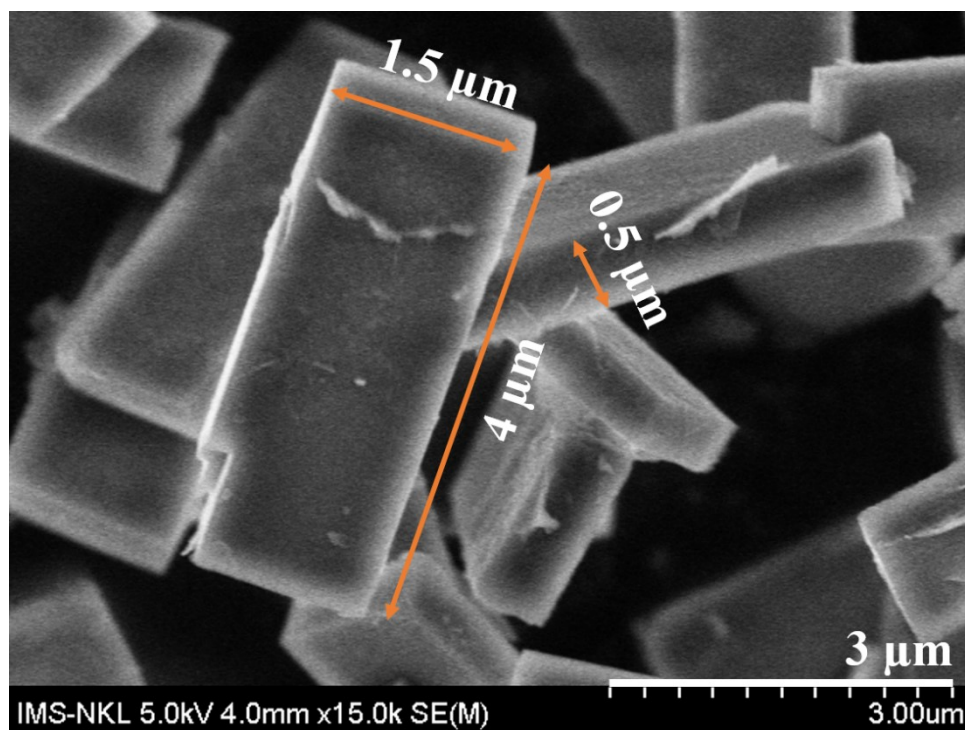

Figure S3. SEM image of RT-60h sample obtained at 15.000 magnification with a scale of 3 μm

**Table S3. Calculation of crystallinity of ZSM-5 sample as different aging condition**

| Sample   | Crystallinity = [area of crystalline peak <sup>a</sup> /area of all peaks <sup>b</sup> ] x 100 |          |                   |
|----------|------------------------------------------------------------------------------------------------|----------|-------------------|
|          | <i>a</i>                                                                                       | <i>b</i> | Crystallinity (%) |
| RT-12h   | 4681.5                                                                                         | 5744.6   | 81.5              |
| RT-36h   | 4102.1                                                                                         | 4853.1   | 84.5              |
| RT-60h   | 5379.0                                                                                         | 6125.5   | 87.8              |
| 60°C-12h | 4964.2                                                                                         | 6439.5   | 77.1              |
| 60°C-36h | 4460.5                                                                                         | 5772.8   | 77.3              |
| 60°C-60h | 4773.6                                                                                         | 6090.1   | 78.4              |
| 80°C-12h | 4636.6                                                                                         | 5909.7   | 78.5              |
| 80°C-36h | 3952.7                                                                                         | 5328.4   | 74.2              |
| 80°C-60h | 3223.1                                                                                         | 4613.2   | 70.0              |
